# Supplementary material for: The Impact of Long-Term Clinoptilolite Administration on the Concentration Profile of Metals in Rodent Organisms
Source: MDPI journal article supplement (doi:10.3390/biology12020193), 2023-01-26
Supplement: s1 [file s1]

## **Supplementary material for the paper:**

### **The impact of the long- term clinoptilolite administration on the concentration profile of metals in rodent organisms**

**Ivan Dolanc <sup>1</sup>, Lejla Ferhatović Hamzić <sup>2</sup>, Tatjana Orct <sup>3</sup>, Vedran Micek <sup>4</sup>, Iva Šunić <sup>5</sup>, Antonija Jonjić <sup>6</sup>, Jasna Jurasović <sup>7</sup>, Saša Missoni <sup>8</sup>, Miran Čoklo <sup>9</sup> and Sandra Kraljević Pavelić <sup>10\*</sup>**

<sup>1</sup> Centre for Applied Bioanthropology, Institute for Anthropological Research, 10000 Zagreb, Croatia

<sup>2</sup> Centre for Applied Bioanthropology, Institute for Anthropological Research, 10000 Zagreb, Croatia

<sup>3</sup> Analytical Toxicology and Mineral Metabolism Unit, Institute for Medical Research and Occupational Health, Zagreb, Croatia

<sup>4</sup> Animal Breeding Unit, Institute for Medical Research and Occupational Health, Zagreb, Croatia

<sup>5</sup> Centre for Applied Bioanthropology, Institute for Anthropological Research, 10000 Zagreb, Croatia

<sup>6</sup> Centre for Applied Bioanthropology, Institute for Anthropological Research, 10000 Zagreb, Croatia

<sup>7</sup> Analytical Toxicology and Mineral Metabolism Unit, Institute for Medical Research and Occupational Health, Zagreb, Croatia

<sup>8</sup> Institute for Anthropological Research, 10000 Zagreb, Croatia

<sup>9</sup> Centre for Applied Bioanthropology, Institute for Anthropological Research, 10000 Zagreb, Croatia

<sup>10</sup> University of Rijeka Faculty of Health Studies, Viktora Cara Emina 5, 51000 Rijeka, Croatia

\* Correspondence [sandrakp@uniri.hr](mailto:sandrakp@uniri.hr); Tel.: (+ 385 51 554 947 )

## Sadržaj

1. Physiological levels of minerals and metals measured in Wistar rats ..... 3
2. Chemical composition and particle size of tested zeolite materials ..... 3

## 1. Physiological levels of minerals and metals measured in Wister rats

**Supplementary Table S1.** Physiological levels of metals and minerals determined from rat plasma and organs as a measure of physiological concentrations of metals and minerals. Concentrations of measured elements in plasma are expressed as mg/l or µg/l, and concentrations of measured elements in organs are expressed as mg/kg or µg/kg.

| Element       |         |         |        |       |           |         |           |        |
|---------------|---------|---------|--------|-------|-----------|---------|-----------|--------|
| ORGAN         | Na      | Mg      | Al     | Si    | p         | Ca      | Fe        | Mn     |
| Concentration | mg/l    | mg/l    | mg/l   | mg/l  | mg/l      | mg/l    | mg/l      | mg/l   |
| Plasma        | 3274,08 | 23,86   | 7,80   | 3,73  | 137,77    | 105,69  | 8,02      | 2,55   |
| Concentration | mg/kg   | mg/kg   | mg/kg  | mg/kg | mg/kg     | mg/kg   | mg/kg     | mg/kg  |
| Brain         | 1270,21 | 199,00  | 247,00 | 1,81  | 3243,51   | 4602,72 | 185,89    | 19,68  |
| Lung          | 1650,21 | 104,54  | 637,06 | 2,84  | 1974,49   | 3257,28 | 120,60    | 108,12 |
| Femur         | 7681,03 | 5747,96 | 952,41 | 6,18  | 128332,22 | 2202,11 | 313003,38 | 62,28  |
| Liver         | 622,33  | 172,96  | 175,97 | 2,70  | 2666,46   | 4014,76 | 39,43     | 450,53 |
| Ovary         | 1076,82 | 128,08  | 128,08 | 4,93  | 1520,03   | 2299,95 | 56,25     | 70,78  |
| Kidney        | 1689,43 | 224,34  | 369,14 | 1,71  | 2838,43   | 2989,42 | 88,51     | 99,54  |
|               |         |         |        |       |           |         |           |        |

| Element       |         |         |          |           |        |         |       |       |
|---------------|---------|---------|----------|-----------|--------|---------|-------|-------|
| ORGAN         | Na      | Mg      | Al       | Si        | p      | Ca      | Fe    | Mn    |
| Concentration | mg/l    | mg/l    | mg/l     | mg/l      | mg/l   | mg/l    | mg/l  | mg/l  |
| Plasma        | 0,80    | 1660,90 | 1620,02  | 42,25     | 382,24 | 0,04    | 0,67  | 0,22  |
| Concentration | mg/kg   | mg/kg   | mg/kg    | mg/kg     | mg/kg  | mg/kg   | mg/kg | mg/kg |
| Brain         | 444,85  | 4,31    | 2888,26  | 14112,51  | 55,27  | 121,54  | 0,10  | 1,60  |
| Lung          | 223,89  | 7,98    | 1925,11  | 26886,11  | 936,46 | 319,85  | 0,87  | 4,30  |
| Femur         | 570,47  | 215,72  | 877,26   | 215596,06 | 151,66 | 108,55  | 0,74  | 17,74 |
| Liver         | 2855,95 | 21,19   | 5446,44  | 33970,60  | 418,85 | 1429,98 | 13,20 | 2,48  |
| Ovary         | 281,48  | 5,47    | 1107,54  | 13412,21  | 130,35 | 197,19  | 0,94  | 5,25  |
| Kidney        | 977,90  | 320,88  | 15719,06 | 27243,05  | 154,32 | 1367,15 | 28,78 | 11,95 |

## 2. Chemical composition and particle size of tested zeolite materials

### 2.1. Chemical Composition

SiO<sub>2</sub>: 65,0 - 71,3 %

Fe<sub>2</sub>O<sub>3</sub>: 0,7 - 1,9 %

Al<sub>2</sub>O<sub>3</sub>: 11,5 - 13,1 %

MgO: 0,6 - 1,2 %

CaO: 2,7 - 5,2 %

Na<sub>2</sub>O: 0,2 - 1,3 %

K<sub>2</sub>O: 2,2 - 3,4 %

TiO<sub>2</sub>: 0,1 - 0,3 %

## 2.2. Mineralogical Composition

Clinoptilolite 86 %

Quarz 2 %

Cristobalite 6 %

Biotite 5 %

Illite - traces

Feldspar traces

Carbonate-mineral traces

## 2.3. Ion selectivity

Cs<sup>+</sup> > NH<sub>4</sub><sup>+</sup> > Pb<sup>2+</sup> > K<sup>+</sup> > Na<sup>+</sup> > Ca<sup>2+</sup> > Mg<sup>2+</sup> > Ba<sup>2+</sup> > Cu<sup>2+</sup>, Zn<sup>2+</sup>

## 2.4. Heavy metals

Pb, lead ≤ 14mg / kg

Hg, mercury ≤ 3 mg / kg

As, arsenic ≤ 1.5 mg / kg

Cd, cadmium ≤ 0.5 mg / kg

Co, cobalt ≤ 5 mg / kg

Va, vanadium ≤ 10 mg / kg

Ni, nickel ≤ 20 mg / kg

## 2.5. Particle size

10% of particles = 1,2 μm

50% of particles = 6,8 μm

90% of particles = 24,2 μm

**Supplementary Table S2.** Particle diameter size of different zeolites assessed by laser light scattering.

| Zeolite | Particle diameter /nm |
|---------|-----------------------|
| TMAZ    | 794,2 ± 29,5          |
| PMA     | 540,4 ± 15,6          |
| PMA-O2  | 494,1 ± 11,2          |
